# Supplementary material for: The Impact of Diet Wheat Source on the Onset of Type 1 Diabetes Mellitus—Lessons Learned from the Non-Obese Diabetic (NOD) Mouse Model
Source: PubMed Central journal article supplement (PMC5452212; doi:10.3390/nu9050482), 2017-05-10
Supplement: nutrients-09-00482-s001.pdf [file nutrients-09-00482-s001.pdf]

## Supplementary

After preparation of the experimental diets, their nutritional content was analyzed in order to confirm comparable nutrient levels in all of the tested diets.

**Table S1.** Nutritional content of the tested diets.

|                    | Diet 1 | Diet 2 | Diet 3 | Diet 4 | Diet 5 |
|--------------------|--------|--------|--------|--------|--------|
| CRUDE PROT (%)     | 23.7   | 23.6   | 23.6   | 23.6   | 23.6   |
| FAT (%)            | 7.0    | 5.8    | 5.8    | 5.7    | 5.8    |
| ASH (%)            | 5.3    | 5.4    | 5.4    | 5.3    | 5.4    |
| CRUDE FIBER (%)    | 6.9    | 6.2    | 6.2    | 6.3    | 6.2    |
| CELLULOSE (%)      | 4.1    | 4.5    | 4.5    | 4.5    | 4.5    |
| HEMI-CELLULOSE (%) | 5.4    | 6.3    | 6.3    | 6.4    | 6.3    |
| LIGNIN (%)         | 2.9    | 2.7    | 2.7    | 2.6    | 2.7    |
| ADF (%)            | 8.8    | 8.1    | 8.1    | 8.0    | 8.1    |
| NDF (%)            | 15.3   | 14.8   | 14.8   | 14.9   | 14.8   |
| NON-N-EXTRACT (%)  | 43.2   | 45.8   | 45.8   | 48.0   | 45.8   |
| SUGAR (%)          | 1.5    | 1.9    | 1.9    | 1.9    | 1.9    |
| STARCH ac hydr (%) | 32.2   | 35.0   | 35.0   | 36.9   | 35.0   |
| CALCIUM (%)        | 1.00   | 1.00   | 1.00   | 1.00   | 1.00   |
| PHOSPHORUS (%)     | 0.63   | 0.63   | 0.63   | 0.63   | 0.63   |
| PHOSPHORUS av (%)  | 0.35   | 0.35   | 0.35   | 0.35   | 0.35   |
| CHLORINE (%)       | 0.30   | 0.31   | 0.31   | 0.31   | 0.31   |
| MAGNESIUM (%)      | 0.19   | 0.19   | 0.19   | 0.19   | 0.19   |
| POTASSIUM (%)      | 0.80   | 0.73   | 0.73   | 0.71   | 0.73   |
| SODIUM (%)         | 0.28   | 0.28   | 0.28   | 0.28   | 0.28   |
| SULPHUR (%)        | 0.18   | 0.19   | 0.19   | 0.19   | 0.19   |
| COPPER (mg)        | 18.56  | 18.12  | 18.12  | 17.54  | 18.12  |
| IODINE (mg)        | 1.26   | 1.27   | 1.27   | 1.26   | 1.27   |
| IRON (mg)          | 108    | 110    | 110    | 108    | 110    |
| MANGANESE (mg)     | 81     | 86     | 86     | 86     | 86     |
| SELENIUM (mg)      | 0.60   | 0.59   | 0.59   | 0.57   | 0.59   |
| ZINC (mg)          | 66     | 71     | 71     | 72     | 71     |
| NICKEL (mg)        | 1.39   | 1.62   | 1.62   | 1.68   | 1.62   |
| FLUORINE (mg)      | 0.67   | 0.92   | 0.92   | 0.93   | 0.92   |
| MOLYBDENUM (mg)    | 0.39   | 0.40   | 0.40   | 0.38   | 0.40   |
| LYSINE (%)         | 1.28   | 1.28   | 1.28   | 1.28   | 1.28   |
| METHIONINE (%)     | 0.50   | 0.50   | 0.50   | 0.50   | 0.50   |
| CYSTEINE (%)       | 0.46   | 0.48   | 0.48   | 0.48   | 0.48   |
| MET + CYS (%)      | 0.93   | 0.95   | 0.95   | 0.96   | 0.95   |
| THREONINE (%)      | 0.95   | 0.91   | 0.91   | 0.88   | 0.91   |
| TRYPTOPHAN (%)     | 0.25   | 0.25   | 0.25   | 0.25   | 0.25   |
| ISOLEUCINE (%)     | 1.06   | 1.04   | 1.04   | 1.01   | 1.04   |
| LEUCINE (%)        | 2.05   | 1.96   | 1.96   | 1.96   | 1.96   |
| VALINE (%)         | 1.16   | 1.15   | 1.15   | 1.16   | 1.15   |
| HISTIDINE (%)      | 0.50   | 0.50   | 0.50   | 0.52   | 0.50   |
| ARGININE (%)       | 1.47   | 1.43   | 1.43   | 1.41   | 1.43   |
| GLYCINE (%)        | 1.30   | 1.24   | 1.24   | 1.20   | 1.24   |
| SERINE (%)         | 1.14   | 1.12   | 1.12   | 1.12   | 1.12   |

|                    |      |      |      |      |      |
|--------------------|------|------|------|------|------|
| GLY + SER (%)      | 2.41 | 2.34 | 2.34 | 2.29 | 2.34 |
| PHENYLALANINE (%)  | 1.28 | 1.25 | 1.25 | 1.22 | 1.25 |
| TYROSINE (%)       | 0.86 | 0.82 | 0.82 | 0.81 | 0.82 |
| PHE + TYROSINE (%) | 2.12 | 2.05 | 2.05 | 2.01 | 2.05 |
| ASPARTIC ACID (%)  | 1.86 | 1.79 | 1.79 | 1.70 | 1.79 |
| GLUTAMIC ACID (%)  | 3.56 | 3.96 | 3.96 | 4.30 | 3.96 |
| PROLINE (%)        | 1.60 | 1.65 | 1.65 | 1.70 | 1.65 |
| ALANINE (%)        | 1.40 | 1.34 | 1.34 | 1.29 | 1.34 |

---
